# Supplementary material for: APOBEC3A drives deaminase mutagenesis in human gastric epithelium
Source: HighWire-hosted journal article supplement (doi:10.1101/gr.280338.124), 2025-08-26
Supplement: Supplemental_Table_S1.xlsx [file Supplemental_Table_S1.xlsx]

## Sheet: Supplemental Table S1
Supplemental Table S1. Genomic coordiantes of integrated constructs in the hGOiA3A and hGOiA3B lines.
The following data is reported for each organoid line: Organoid lines = organoid line identifier, Chromosome = chromosome of genomic coordinates of inserted cassetes; Position = position of genomic coordinates of inserted cassetes
Organoid lines	Chromosome	Position
hGOiA3A	3	98618476
hGOiA3A	9	86027095
hGOiA3B	12	20817709
hGOiA3B	20	12066822
hGOiA3B	20	13081159
