# Supplementary material for: APOBEC3A drives deaminase mutagenesis in human gastric epithelium
Source: HighWire-hosted journal article supplement (doi:10.1101/gr.280338.124), 2025-08-26
Supplement: Supplemental_Table_S2.xlsx [file Supplemental_Table_S2.xlsx]

## Sheet: Supplemental Table S2
Supplemental Table S2. The number of integrated constructs in the hGOiA3A and hGOiA3B lines.
The following data is reported for each organoid lines: Cassete= cassette identifier; hGOiA3A = dox-inducible APOBEC3A overexpression human gastric organoid lines; hGOiA3B = dox-inducible APOBEC3B overexpression human gastric organoid lines.
Cassete	hGOiA3A	hGOiA3B
cassete #1 (CMV-rtTA-HygR)	≥1 copy	≥1 copy
cassete #2 (TRE-APOBEC (A3A or A3B)-IRES-mCherry)	1 copy	3 copies
