# Supplementary material for: APOBEC3A drives deaminase mutagenesis in human gastric epithelium
Source: HighWire-hosted journal article supplement (doi:10.1101/gr.280338.124), 2025-08-26
Supplement: Supplemental_Table_S3.xlsx [file Supplemental_Table_S3.xlsx]

## Sheet: Supplementary Table S3
Supplemental Table S3 - The ratio of endogenous A3A and A3B in the hGOiA3A and hGOiA3B lines in each condition.
The following data is reported for each organoid line: Sample_id = RNAseq data identifier, Chromosome = chromosome of genomic coordinates of heterozygous or homozygous variants in endogenous DNA; Position1 = position of genomic coordinates of first heterozygous or homozygous variant, Position2 = postiion of genomic coordinates of second heterozygous or homozygous variant, Endogenous = the number …
Sample_id	Chromosome	Position1	Position2	Endogenous	Exogenuous	Total	Endogenous_RNA_ratio
A3A_1st_C3_0h_100ng_bat1-1	22	39357586	39357599	2	39	41	0.0487805
A3A_1st_C3_0h_100ng_bat1-2	22	39357586	39357599	0	94	94	0
A3A_1st_C3_0h_100ng_bat1-3	22	39357586	39357599	1	27	28	0.0357143
A3A_1st_C3_48h_100ng_bat1-1	22	39357586	39357599	0	3892	3892	0
A3A_1st_C3_48h_100ng_bat1-2	22	39357586	39357599	3	3123	3126	0.000959693
A3A_1st_C3_48h_100ng_bat1-3	22	39357586	39357599	6	3441	3447	0.00174064
A3A_1st_C3_48h_3ug_bat3-1	22	39357586	39357599	3	4519	4522	0.000663423
A3A_1st_C3_48h_3ug_bat3-2	22	39357586	39357599	2	4251	4253	0.000470256
A3A_1st_C3_48h_3ug_bat3-3	22	39357586	39357599	3	3975	3978	0.000754148
A3B_1st_C5_0h_100ng_bat1-1	22	39381999	39381999	220	9	229	0.960699
A3B_1st_C5_0h_100ng_bat1-2	22	39381999	39381999	206	1	207	0.995169
A3B_1st_C5_0h_100ng_bat1-3	22	39381999	39381999	196	1	197	0.994924
A3B_1st_C5_48h_100ng_bat1-1	22	39381999	39381999	42	15554	15596	0.002693
A3B_1st_C5_48h_100ng_bat1-2	22	39381999	39381999	31	14595	14626	0.00211951
A3B_1st_C5_48h_100ng_bat1-3	22	39381999	39381999	33	13274	13307	0.0024799
A3B_1st_C5_48h_3ug_bat1-1	22	39381999	39381999	33	20949	20982	0.00157278
A3B_1st_C5_48h_3ug_bat1-2	22	39381999	39381999	29	20661	20690	0.00140164
A3B_1st_C5_48h_3ug_bat1-3	22	39381999	39381999	21	11929	11950	0.00175732
