# Supplementary material for: APOBEC3A drives deaminase mutagenesis in human gastric epithelium
Source: HighWire-hosted journal article supplement (doi:10.1101/gr.280338.124), 2025-08-26
Supplement: Supplemental_Table_S4.xlsx [file Supplemental_Table_S4.xlsx]

## Sheet: Supplementary Table S4
Supplemental Table S4. Mutation spectra of SNVs identified by whole-genome sequencing in clones and duplex sequencing.
The following data is reported for mutationa spectra of each sequencing results: Sample_id = sample id of each genome sequencing, and each column represent the number of mutations depending on the .mutation type and context
Sample_id	Sample_type	AC>AA	AC>AC	AC>AG	AC>AT	CC>AA	CC>AC	CC>AG	CC>AT	GC>AA	GC>AC	GC>AG	GC>AT	TC>AA	TC>AC	TC>AG	TC>AT	AC>GA	AC>GC	AC>GG	AC>GT	CC>GA	CC>GC	CC>GG	CC>GT	GC>GA	GC>GC	GC>GG	GC>GT	TC>GA	TC>GC	TC>GG	TC>GT	AC>TA	AC>TC	AC>TG	AC>TT	CC>TA	CC>TC	CC>TG	CC>TT	GC>TA	GC>TC	GC>TG	GC>TT	TC>TA	TC>TC	TC>TG	TC>TT
A3A_1st_C3_Ctrl-1	clone	8	1	1	3	7	0	2	8	9	8	3	5	11	7	2	15	2	1	0	2	1	2	0	1	1	0	0	5	10	4	0	17	6	3	2	6	2	3	1	7	3	1	2	3	28	8	9	19
A3A_1st_C3_Ctrl-2	clone	13	7	1	5	4	4	2	7	15	6	3	17	14	7	1	32	2	1	0	2	3	0	0	4	0	1	0	4	16	2	2	12	4	2	3	5	10	1	2	8	5	4	1	2	51	13	7	30
A3A_1st_C3_Ctrl-3	clone	9	4	1	1	3	4	0	6	8	3	3	3	8	1	0	5	0	1	2	1	1	2	0	4	1	0	1	0	3	2	0	3	4	2	1	1	4	3	0	2	2	0	2	1	8	3	2	4
A3A_1st_C3_100ng-1	clone	22	7	3	6	20	2	2	18	17	5	6	10	47	19	7	46	5	2	0	5	4	1	1	7	1	2	0	3	149	31	8	201	9	1	0	8	13	7	9	9	7	5	6	4	219	39	21	125
A3A_1st_C3_100ng-2	clone	13	7	1	11	5	3	1	10	18	5	2	12	28	9	1	25	2	1	0	0	3	0	0	2	0	5	0	6	29	9	1	54	5	2	7	5	5	6	2	5	4	2	8	1	82	27	8	53
A3A_1st_C3_100ng-3	clone	18	4	4	8	7	1	3	8	21	6	0	17	14	6	3	35	1	3	0	3	0	0	0	4	1	1	0	2	12	3	0	11	8	5	4	5	8	6	4	4	5	3	2	3	19	8	5	12
A3A_1st_C3_100ng-4	clone	19	1	0	5	14	3	3	5	20	4	0	15	19	3	2	23	2	0	0	3	3	2	1	3	1	1	0	3	19	5	2	21	9	4	2	4	9	6	5	2	6	4	1	2	44	7	7	17
A3A_1st_C3_100ng-5	clone	16	5	0	6	8	2	3	8	11	3	0	12	12	9	0	11	2	0	1	5	1	4	1	2	0	0	0	0	10	3	0	10	5	1	1	1	1	9	4	2	4	3	2	8	18	12	5	9
A3A_1st_C3_3ug-1	clone	17	1	0	6	8	3	3	7	11	0	1	9	30	19	6	35	2	0	1	5	2	1	0	4	3	1	0	2	89	16	4	139	6	4	4	6	8	3	7	1	7	0	2	5	174	31	16	104
A3A_1st_C3_3ug-2	clone	35	5	4	8	20	12	2	11	18	10	5	14	177	73	13	130	14	3	1	12	12	4	1	17	5	3	0	12	689	168	31	1020	20	10	5	8	48	14	16	23	18	12	10	18	1198	198	121	650
A3A_1st_C3_3ug-3	clone	27	8	1	7	17	11	4	18	25	6	2	22	84	27	9	54	10	5	2	7	11	3	1	3	10	4	0	7	310	47	19	381	16	6	11	10	22	10	12	4	9	6	6	5	437	81	47	212
A3A_1st_C3_3ug-4	clone	36	8	4	8	18	8	5	14	32	4	3	17	89	43	14	100	10	2	3	8	5	4	3	11	3	2	0	5	315	66	15	415	18	4	4	15	30	12	10	12	15	6	4	11	538	121	61	311
A3A_1st_C3_3ug-5	clone	16	4	1	4	12	6	3	12	11	4	1	8	127	68	13	116	7	3	0	6	7	3	0	12	5	0	1	7	494	110	28	737	23	3	6	8	34	6	14	9	23	9	2	12	864	180	67	481
A3A_C3_TP53KO_C3_Ctrl-1	clone	8	3	0	5	9	3	2	5	12	3	1	9	17	11	4	29	2	2	0	0	2	0	0	3	1	0	0	1	27	4	0	43	5	0	4	5	7	5	8	3	2	2	4	5	99	18	22	51
A3A_C3_TP53KO_C3_Ctrl-2	clone	8	2	1	4	4	1	1	2	13	5	0	10	14	8	3	14	3	1	0	4	1	3	1	1	1	2	1	0	28	8	2	58	5	3	6	6	3	3	5	3	2	3	6	0	92	23	13	42
A3A_C3_TP53KO_C3_Ctrl-3	clone	9	0	0	2	8	2	1	12	7	2	2	10	21	13	2	25	3	2	1	4	4	2	0	2	0	2	0	2	26	2	4	44	7	3	2	7	8	5	7	4	9	4	3	3	96	20	10	43
A3A_C3_TP53KO_C3_100ng-1	clone	12	2	0	6	11	4	1	9	9	6	1	8	58	23	3	61	5	0	0	3	1	2	0	8	1	1	0	2	216	39	11	260	9	5	6	8	20	6	2	4	9	4	2	5	360	68	33	186
A3A_C3_TP53KO_C3_100ng-2	clone	11	0	0	1	11	3	1	3	4	2	2	6	65	41	4	42	2	0	0	2	1	1	0	5	2	0	2	3	191	23	11	270	5	3	2	3	16	5	4	12	6	3	7	10	385	65	37	246
A3A_C3_TP53KO_C3_100ng-3	clone	9	6	0	6	8	3	0	4	11	1	0	3	87	40	11	70	7	1	0	2	5	0	0	12	3	1	1	4	348	70	13	483	11	2	1	3	22	3	9	12	5	8	2	6	573	110	64	277
A3A_C3_TP53KO_C3_3ug-1	clone	7	1	2	4	5	2	1	7	9	2	0	3	27	14	4	18	2	0	0	6	4	0	0	1	0	0	0	1	72	10	2	101	6	2	3	1	11	3	2	3	7	1	1	5	165	37	18	77
A3A_C3_TP53KO_C3_3ug-2	clone	8	3	1	3	10	3	1	3	6	4	0	7	72	42	8	69	7	3	1	10	5	2	0	8	2	0	0	3	267	35	11	360	10	7	3	9	17	3	4	12	14	6	1	10	627	113	70	331
A3A_C3_TP53KO_C3_3ug-3	clone	9	1	2	5	14	12	4	9	16	6	3	9	160	57	15	125	9	1	0	10	8	2	0	10	2	1	0	10	481	81	23	707	22	7	9	10	25	5	8	13	11	6	7	6	793	157	88	433
A3B_1st_C5_100ng_C1	clone	8	2	1	4	9	6	3	6	7	6	2	2	8	4	0	6	3	1	0	1	0	0	1	0	0	2	0	1	2	4	0	6	12	5	3	10	3	4	4	4	6	2	4	4	5	7	0	8
A3B_1st_C5_100ng_C3	clone	19	4	3	7	8	5	3	11	8	6	3	6	11	3	1	19	3	1	3	2	1	3	0	0	1	0	0	2	3	4	0	6	12	5	2	3	4	4	6	8	6	4	9	4	9	6	3	9
A3B_C5_TP53KO_Ctrl_C1	clone	6	0	1	2	1	0	1	4	2	1	0	3	2	1	0	4	1	0	0	2	0	0	0	1	0	1	0	0	0	0	0	3	3	1	3	1	1	1	0	1	0	0	0	2	0	1	3	0
A3B_C5_TP53KO_Ctrl_C2	clone	5	2	1	5	1	2	0	4	5	1	0	7	4	2	1	11	2	1	0	2	0	0	1	2	0	0	0	3	3	4	0	2	4	4	2	4	4	0	0	1	2	1	0	0	6	4	3	2
A3B_C5_TP53KO_Ctrl_C3	clone	6	3	0	2	5	1	0	2	6	2	2	4	9	2	1	7	0	1	0	1	1	2	0	2	2	0	0	0	0	0	0	2	1	1	2	1	1	0	3	1	3	3	0	3	1	2	0	3
A3B_C5_TP53KO_100ng_C1	clone	8	1	1	4	4	0	2	6	7	2	1	5	10	11	0	18	1	0	2	2	0	0	0	3	2	1	0	0	2	5	0	4	3	1	2	3	1	2	2	2	2	4	0	1	12	4	0	4
A3B_C5_TP53KO_100ng_C2	clone	8	3	1	4	3	1	0	4	3	2	1	4	9	4	2	11	1	3	1	2	1	3	0	3	0	0	0	1	4	2	0	7	4	2	1	2	4	1	1	2	2	3	1	0	10	3	0	8
A3B_C5_TP53KO_100ng_C12	clone	5	1	1	4	4	2	1	2	5	1	0	7	8	4	0	9	2	0	0	4	0	1	0	2	1	0	1	0	3	1	0	7	3	2	3	4	2	2	2	3	3	1	2	3	4	5	0	8
A3B_C5_TP53KO_3ug_C5	clone	4	3	0	1	1	0	0	0	3	2	0	0	4	0	0	4	1	0	1	1	0	0	0	1	0	0	0	0	2	1	0	8	5	0	1	1	1	0	1	2	1	0	0	2	2	3	3	4
A3B_C5_TP53KO_3ug_C9	clone	3	2	1	3	1	1	0	7	6	3	0	4	3	5	0	9	3	1	3	1	1	2	0	1	1	2	0	0	1	1	0	5	4	1	3	5	4	3	1	2	2	0	3	0	5	2	1	4
A3B_C5_TP53KO_3ug_C14	clone	1	0	0	2	1	1	0	1	1	0	0	2	4	3	1	0	0	1	0	1	1	1	1	2	0	1	0	1	1	2	0	5	1	0	1	0	1	1	1	2	1	0	0	1	4	0	1	1
A3A_1st_C3_0h_100ng/ml_bat1-1	duplex	21	15	3	12	27	10	2	9	17	8	5	21	24	10	4	21	20	15	3	14	25	10	3	13	15	10	4	12	34	9	6	47	47	27	23	38	35	22	23	33	27	11	20	37	37	29	26	44
A3A_1st_C3_12h_100ng/ml_bat1-1	duplex	38	11	4	11	11	7	4	12	17	6	2	8	10	16	3	25	19	7	3	10	17	10	2	18	7	8	0	9	42	16	6	64	40	27	19	25	33	24	19	39	27	20	17	19	73	32	30	58
A3A_1st_C3_24h_100ng/ml_bat1-1	duplex	36	16	2	16	19	11	1	21	14	11	2	20	44	15	5	56	32	19	4	23	24	13	6	23	15	11	2	18	105	38	10	163	72	34	28	30	51	38	36	40	38	30	30	31	368	99	48	210
A3A_1st_C3_36h_100ng/ml_bat1-1	duplex	27	14	6	17	31	9	6	14	21	9	3	11	47	21	4	56	29	15	3	15	24	6	6	16	11	8	5	14	125	33	11	148	58	33	27	32	54	30	31	33	31	23	25	31	336	79	48	204
A3A_1st_C3_48h_100ng/ml_bat1-1	duplex	33	19	7	23	29	16	6	21	30	13	7	9	69	28	6	70	36	14	7	24	32	14	7	22	17	7	5	15	192	53	16	303	76	55	29	59	70	28	34	58	51	29	36	39	693	126	111	388
A3A_1st_C3_48h_100ng/ml_bat1-2	duplex	27	5	1	15	26	13	1	16	14	5	0	18	62	22	10	72	29	11	6	20	17	12	4	14	8	10	2	12	153	45	11	283	51	24	24	32	52	23	33	34	42	20	20	19	587	137	70	311
A3A_1st_C3_48h_100ng/ml_bat1-3	duplex	33	13	2	15	18	5	5	7	19	6	4	15	61	23	8	62	10	13	2	13	11	10	2	20	12	14	2	12	178	52	18	254	54	23	21	37	54	34	37	42	34	31	27	42	627	157	92	359
A3A_1st_C3_48h_3ug/ml_bat1-1	duplex	25	15	5	8	20	9	5	15	18	6	5	8	76	30	17	58	22	13	1	19	17	8	6	13	13	6	6	13	189	57	12	254	72	21	32	27	72	34	41	50	40	37	38	33	1038	197	139	522
A3A_1st_C3_48h_3ug/ml_bat1-2	duplex	23	14	2	8	26	9	3	14	8	11	1	10	77	27	8	69	20	8	5	13	23	10	3	14	12	8	1	12	175	56	14	258	62	24	25	31	60	33	29	49	42	27	31	39	874	180	112	459
A3A_1st_C3_48h_3ug/ml_bat1-3	duplex	37	20	10	13	22	21	10	18	26	14	4	12	109	30	14	93	22	11	5	19	20	7	6	26	20	15	9	20	264	84	14	361	92	31	32	38	93	35	42	57	48	38	44	49	1285	278	169	675
A3B_1st_C5_0h_100ng/ml_bat1-1	duplex	12	5	0	3	9	7	1	8	8	2	4	10	7	3	1	5	13	6	4	10	9	6	1	9	8	8	2	9	18	11	1	16	19	5	13	13	24	13	11	14	8	8	13	8	16	9	9	16
A3B_1st_C5_0h_100ng/ml_bat1-2	duplex	13	4	1	5	9	6	2	2	2	2	2	2	8	4	0	6	9	4	3	6	3	3	4	3	9	4	2	5	11	11	0	18	13	11	13	14	14	6	6	9	9	2	7	8	7	10	9	11
A3B_1st_C5_0h_100ng/ml_bat1-3	duplex	63	25	10	25	26	12	13	21	19	19	9	17	22	16	4	23	33	15	4	15	24	12	12	20	18	16	18	15	15	24	6	30	98	50	69	61	59	35	67	52	46	43	47	43	35	51	47	79
A3B_1st_C5_12h_100ng/ml_bat1-1	duplex	45	13	3	5	18	16	13	16	13	13	4	9	13	7	6	15	17	12	3	13	7	9	8	7	8	8	15	8	18	12	4	22	54	22	41	38	28	33	53	24	25	26	41	31	26	27	21	45
A3B_1st_C5_12h_100ng/ml_bat1-2	duplex	15	14	4	7	7	10	5	9	4	4	4	7	7	5	1	11	11	7	5	9	6	1	5	0	3	8	8	6	11	3	3	10	24	14	15	16	20	18	24	13	23	4	18	18	18	18	19	29
A3B_1st_C5_12h_100ng/ml_bat1-3	duplex	24	9	2	4	6	4	3	7	8	5	3	6	5	3	3	10	13	16	5	12	5	4	2	7	9	4	8	7	10	2	8	15	33	15	29	20	21	12	30	22	17	12	23	14	15	17	18	37
A3B_1st_C5_24h_100ng/ml_bat1-1	duplex	15	4	1	5	3	3	2	6	3	1	5	3	6	2	0	3	9	4	3	4	1	3	0	1	2	5	3	7	3	1	0	4	12	7	13	9	8	14	9	10	8	8	11	12	9	5	11	15
A3B_1st_C5_24h_100ng/ml_bat1-2	duplex	26	9	4	8	11	6	3	3	12	10	2	3	4	6	3	8	11	6	4	7	8	5	2	1	8	5	8	5	8	5	5	14	34	13	18	19	19	19	21	16	19	20	22	19	14	22	10	29
A3B_1st_C5_24h_100ng/ml_bat1-3	duplex	21	7	1	6	13	4	4	12	9	4	4	5	6	5	1	10	8	7	1	7	7	6	6	6	4	5	5	4	7	3	2	17	29	12	23	23	18	9	28	20	21	18	31	12	14	15	12	20
A3B_1st_C5_36h_100ng/ml_bat1-1	duplex	44	19	6	11	19	13	9	12	19	15	6	14	17	9	6	20	26	13	7	17	8	8	4	11	11	14	20	9	20	13	4	30	72	30	59	37	51	39	46	46	26	29	56	26	26	37	31	57
A3B_1st_C5_36h_100ng/ml_bat1-2	duplex	10	8	1	2	7	3	0	5	1	4	0	4	4	2	4	5	6	3	1	6	2	1	2	1	2	2	7	2	5	2	2	5	22	17	21	16	11	12	20	17	10	7	18	12	12	8	5	12
A3B_1st_C5_36h_100ng/ml_bat1-3	duplex	27	13	3	9	14	9	1	10	10	8	6	3	10	2	1	7	10	10	5	8	4	11	8	5	8	4	6	8	6	4	0	14	33	13	28	22	22	19	31	23	25	19	27	13	21	23	9	23
A3B_1st_C5_48h_100ng/ml_bat1-1	duplex	6	2	1	4	1	1	0	4	2	1	0	5	2	0	0	3	3	3	1	4	3	1	0	2	2	3	0	4	6	1	0	5	10	1	0	4	7	0	6	11	9	7	3	6	7	7	2	11
A3B_1st_C5_48h_100ng/ml_bat1-2	duplex	8	2	1	5	10	7	1	6	6	6	0	1	7	6	3	7	7	7	2	8	11	2	2	6	4	1	2	9	15	8	3	14	22	13	17	15	23	17	17	23	13	13	13	12	27	19	11	33
A3B_1st_C5_48h_100ng/ml_bat1-3	duplex	16	9	2	7	10	2	0	7	6	8	3	6	15	3	3	4	10	7	3	9	0	5	2	7	6	5	5	10	7	9	2	18	34	16	31	22	21	16	20	21	21	12	27	22	15	13	18	36
A3B_1st_C5_48h_3ug/ml_bat1-1	duplex	5	1	2	0	3	1	0	0	1	1	2	1	0	1	0	0	1	1	0	1	0	2	0	0	2	0	0	0	1	1	1	0	8	7	6	2	5	5	4	7	6	3	1	2	5	3	1	6
A3B_1st_C5_48h_3ug/ml_bat1-2	duplex	4	3	1	1	4	0	0	3	2	1	1	1	3	4	2	3	3	3	1	2	4	1	1	4	1	2	2	1	1	4	3	5	6	7	6	7	6	8	5	4	12	3	9	3	11	4	5	9
A3B_1st_C5_48h_3ug/ml_bat1-3	duplex	57	14	9	17	19	14	7	11	9	13	10	14	11	9	4	13	16	10	4	19	14	10	8	9	16	16	14	8	17	20	8	27	57	43	63	38	37	39	56	37	34	36	42	38	40	31	41	61
[truncated: 48 more columns]
