# Supplementary material for: APOBEC3A drives deaminase mutagenesis in human gastric epithelium
Source: HighWire-hosted journal article supplement (doi:10.1101/gr.280338.124), 2025-08-26
Supplement: Supplemental_Table_S5.xlsx [file Supplemental_Table_S5.xlsx]

## Sheet: Supplemental Table S5
Supplemental Table S5. Summary of somatic mutations (single nucleotide variants (SNVs), indels, and structural variations(SVs)) in each clone.
The following data is reported for each clonal organoid line: Sample_id = sample identifier; APOBEC = overexpressed APOBEC enzymes; Dox conc. (μg/ml) = concentration of doxycycline used in the experiment; TP53 = mutational status of TP53; SBS1 = the number of single nucleotide variants corresponding to SBS1 in the COSMIC database; SBS2 = the number of single nucleotide variants corresponding to S…
				Single nucleotide variants									Indel			Structural variations
Sample_id	APOBEC	Dox conc. (μg/ml)	TP53	SBS1	SBS2	SBS5	SBS13	SBS18	SBS40	APOBEC-associated mutation (SBS2+SBS13)	RTCA_mut_count	YTCA_mut_count	ID1	ID2	ID9	DEL	DUP	INV	TRA
A3A_1st_C3_Ctrl-1	A3A	0	WT	0	44	120	33	78	47	77	16	22	4	18	3	1	0	0	0
A3A_1st_C3_Ctrl-2	A3A	0	WT	0	84	98	32	157	58	116	21	46	7	17	10	0	0	0	0
A3A_1st_C3_Ctrl-3	A3A	0	WT	0	8	38	3	48	86	11	4	7	2	6	0	2	0	0	0
A3A_1st_C3_100ng-1	A3A	0.1	WT	0	382	101	490	159	121	872	127	242	4	15	11	3	0	0	0
A3A_1st_C3_100ng-2	A3A	0.1	WT	11	145	40	113	135	141	258	26	85	8	15	8	1	1	0	0
A3A_1st_C3_100ng-3	A3A	0.1	WT	0	24	128	25	194	43	49	11	20	4	26	7	0	0	0	0
A3A_1st_C3_100ng-4	A3A	0.1	WT	1	65	26	49	162	139	114	23	40	18	33	2	6	0	0	0
A3A_1st_C3_100ng-5	A3A	0.1	WT	1	22	46	19	89	135	41	7	21	3	14	3	0	0	0	0
A3A_1st_C3_3ug-1	A3A	3	WT	5	312	65	323	112	96	635	79	184	17	12	9	0	0	0	0
A3A_1st_C3_3ug-2	A3A	3	WT	23	2131	0	2442	108	333	4573	502	1385	8	16	11	0	0	0	0
A3A_1st_C3_3ug-3	A3A	3	WT	22	764	115	989	156	159	1753	209	538	4	34	12	1	0	0	0
A3A_1st_C3_3ug-4	A3A	3	WT	0	968	122	1030	279	202	1998	227	626	14	18	23	7	0	0	0
A3A_1st_C3_3ug-5	A3A	3	WT	6	1538	0	1744	122	262	3282	386	975	2	22	24	3	0	0	0
A3A_C3_TP53KO_C3_Ctrl-1	A3A	0	KO	11	170	90	95	134	28	265	35	91	16	12	6	2	0	0	0
A3A_C3_TP53KO_C3_Ctrl-2	A3A	0	KO	14	155	83	120	72	63	275	31	89	9	12	3	4	0	0	0
A3A_C3_TP53KO_C3_Ctrl-3	A3A	0	KO	3	153	90	91	100	124	244	37	85	9	15	0	5	0	0	0
A3A_C3_TP53KO_C3_100ng-1	A3A	0.1	KO	2	629	51	669	134	88	1298	135	442	10	8	24	2	0	0	0
A3A_C3_TP53KO_C3_100ng-2	A3A	0.1	KO	6	703	0	646	82	138	1349	142	434	9	11	14	3	0	0	0
A3A_C3_TP53KO_C3_100ng-3	A3A	0.1	KO	6	1001	69	1188	95	22	2189	258	665	3	11	9	1	0	0	0
A3A_C3_TP53KO_C3_3ug-1	A3A	3	KO	4	282	27	242	57	107	524	64	173	16	7	8	0	0	0	0
A3A_C3_TP53KO_C3_3ug-2	A3A	3	KO	1	1119	113	892	131	10	2011	255	641	13	10	16	2	0	0	0
A3A_C3_TP53KO_C3_3ug-3	A3A	3	KO	16	1415	44	1697	239	100	3112	364	914	7	10	12	7	0	0	0
A3B_1st_C5_100ng_C1	A3B	0.1	WT	2	0	191	0	32	117	0	2	5	65	27	4	0	0	0	0
A3B_1st_C5_100ng_C3	A3B	0.1	WT	9	1	133	0	86	193	1	8	4	70	29	5	0	0	0	0
A3B_C5_TP53KO_Ctrl_C1	A3B	0	KO	5	0	6	1	22	51	1	0	0	6	6	0	0	0	0	0
A3B_C5_TP53KO_Ctrl_C2	A3B	0	KO	0	4	82	3	51	34	7	6	3	7	10	3	2	0	0	0
A3B_C5_TP53KO_Ctrl_C3	A3B	0	KO	0	0	56	0	56	29	0	1	0	5	4	3	0	0	0	0
A3B_C5_TP53KO_100ng_C1	A3B	0.1	KO	0	13	2	6	88	91	19	9	5	8	7	2	0	0	0	0
A3B_C5_TP53KO_100ng_C2	A3B	0.1	KO	0	11	22	10	42	115	21	10	5	6	13	3	1	2	0	0
A3B_C5_TP53KO_100ng_C12	A3B	0.1	KO	4	5	31	9	46	77	14	3	4	3	6	6	1	0	0	0
A3B_C5_TP53KO_3ug_C5	A3B	3	KO	1	3	37	12	16	24	15	2	2	2	1	1	1	0	0	0
A3B_C5_TP53KO_3ug_C9	A3B	3	KO	5	3	44	3	39	75	6	4	2	3	11	8	1	0	0	0
A3B_C5_TP53KO_3ug_C14	A3B	3	KO	3	3	0	7	3	58	10	1	4	1	11	0	0	0	0	0
