# Supplementary material for: APOBEC3A drives deaminase mutagenesis in human gastric epithelium
Source: HighWire-hosted journal article supplement (doi:10.1101/gr.280338.124), 2025-08-26
Supplement: Supplemental_Table_S6.xlsx [file Supplemental_Table_S6.xlsx]

## Sheet: Supplemental Table S6
Supplemental Table S6. Summary of SNV mutational signature burdens in BotSeqS results.
The following data is reported for each BotSeqS result: Sample_id = sample identifier; APOBEC = overexpressed APOBEC enzymes; Time = the duration of doxycycline treatment; Dox conc. (μg/ml) = concentration of doxycycline used in the experiment; SBS1 = the number of single nucleotide variants corresponding to SBS1 in the COSMIC database; SBS2 = the number of single nucleotide variants correspondin…
Sample_id	APOBEC	Time	Dox conc. (μg/ml)	SBS1	SBS2	SBS5	SBS13	SBS18	SBS40	APOBEC-associated mutation (SBS2+SBS13)	Covered_length (bp)	norm.SBS1	norm.SBS2	norm.SBS5	norm.SBS13	norm.SBS18	norm.SBS40	norm.APOBEC-associated mutation (norm.SBS2+norm.SBS13)
A3A_1st_C3_0h_100ng/ml_bat1-1	A3A	0h	0	40	18	1131	69	24	325	87	2842497667	135	61	3807	232	81	1094	293
A3A_1st_C3_12h_100ng/ml_bat1-1	A3A	12h	0.1	40	89	816	107	0	421	196	2537779825	151	336	3076	403	0	1587	739
A3A_1st_C3_24h_100ng/ml_bat1-1	A3A	24h	0.1	63	616	1108	338	35	546	954	2751599155	219	2142	3853	1175	122	1899	3317
A3A_1st_C3_36h_100ng/ml_bat1-1	A3A	36h	0.1	60	580	918	353	87	504	933	2471268099	232	2246	3554	1367	337	1951	3613
A3A_1st_C3_48h_100ng/ml_bat1-1	A3A	48h	0.1	75	1210	1329	666	58	538	1876	3601797127	199	3214	3530	1769	154	1429	4983
A3A_1st_C3_48h_100ng/ml_bat1-2	A3A	48h	0.1	51	1011	858	592	84	452	1603	2449736038	199	3949	3351	2312	328	1765	6261
A3A_1st_C3_48h_100ng/ml_bat1-3	A3A	48h	0.1	55	1112	1108	584	60	342	1696	2909542933	181	3657	3644	1920	197	1125	5577
A3A_1st_C3_48h_3ug/ml_bat1-1	A3A	48h	3	94	1831	1071	607	84	294	2438	2308480303	390	7589	4439	2516	348	1219	10105
A3A_1st_C3_48h_3ug/ml_bat1-2	A3A	48h	3	65	1537	916	590	83	409	2127	2117554333	294	6945	4139	2666	375	1848	9611
A3A_1st_C3_48h_3ug/ml_bat1-3	A3A	48h	3	85	2279	1360	862	171	305	3141	2931147391	277	7439	4439	2814	558	996	10253
A3B_1st_C5_0h_100ng/ml_bat1-1	A3B	0h	0	31	3	425	26	0	228	29	1387314871	214	21	2931	179	0	1572	200
A3B_1st_C5_0h_100ng/ml_bat1-2	A3B	0h	0	25	0	308	26	0	197	26	1100259917	217	0	2678	226	0	1713	226
A3B_1st_C5_0h_100ng/ml_bat1-3	A3B	0h	0	152	0	2136	0	0	364	0	909806877	1598	0	22462	0	0	3828	0
A3B_1st_C5_12h_100ng/ml_bat1-1	A3B	12h	0.1	117	1	1163	5	0	331	6	639368958	1751	15	17403	75	0	4953	90
A3B_1st_C5_12h_100ng/ml_bat1-2	A3B	12h	0.1	43	11	701	1	0	141	12	269924413	1524	390	24847	35	0	4998	425
A3B_1st_C5_12h_100ng/ml_bat1-3	A3B	12h	0.1	82	9	641	2	0	260	11	277268939	2830	311	22119	69	0	8972	380
A3B_1st_C5_24h_100ng/ml_bat1-1	A3B	24h	0.1	29	3	403	0	0	66	3	152218530	1823	189	25330	0	0	4148	189
A3B_1st_C5_24h_100ng/ml_bat1-2	A3B	24h	0.1	44	2	729	0	0	174	2	298925962	1408	64	23333	0	0	5569	64
A3B_1st_C5_24h_100ng/ml_bat1-3	A3B	24h	0.1	69	0	713	3	1	169	3	311232984	2121	0	21918	92	31	5195	92
A3B_1st_C5_36h_100ng/ml_bat1-1	A3B	36h	0.1	142	0	1551	12	2	267	12	630362913	2155	0	23541	182	30	4053	182
A3B_1st_C5_36h_100ng/ml_bat1-2	A3B	36h	0.1	54	1	446	0	0	76	1	162045268	3188	59	26333	0	0	4487	59
A3B_1st_C5_36h_100ng/ml_bat1-3	A3B	36h	0.1	69	0	830	0	0	218	0	386588635	1708	0	20542	0	0	5395	0
A3B_1st_C5_48h_100ng/ml_bat1-1	A3B	48h	0.1	3	7	140	6	0	91	13	444066344	65	151	3016	129	0	1961	280
A3B_1st_C5_48h_100ng/ml_bat1-2	A3B	48h	0.1	36	35	585	20	0	111	55	1273215320	271	263	4396	150	0	834	413
A3B_1st_C5_48h_100ng/ml_bat1-3	A3B	48h	0.1	73	7	726	8	0	156	15	309219892	2259	217	22463	248	0	4827	465
A3B_1st_C5_48h_3ug/ml_bat1-1	A3B	48h	3	10	5	117	0	0	23	5	174281799	549	274	6423	0	0	1263	274
A3B_1st_C5_48h_3ug/ml_bat1-2	A3B	48h	3	16	10	240	0	0	57	10	395347943	387	242	5808	0	0	1379	242
A3B_1st_C5_48h_3ug/ml_bat1-3	A3B	48h	3	153	17	1478	0	0	403	17	712958910	2053	228	19834	0	0	5408	228
