# Supplementary material for: APOBEC3A drives deaminase mutagenesis in human gastric epithelium
Source: HighWire-hosted journal article supplement (doi:10.1101/gr.280338.124), 2025-08-26
Supplement: Supplemental_Table_S7.xlsx [file Supplemental_Table_S7.xlsx]

## Sheet: Supplemental Table S7
Supplemental Table S7. Summary of the sequencing throughput and the number of C>U RNA editing sites across the hGOiA3A and hGOiA3B lines.
The following data is reported for each hGOiA3A and hGOiA3B lines: Sample_id = RNA-seq sample identifier; APOBEC = APOBEC enzymes; Dox conc. (μg/ml) = doxycycline treatment condition; Mapped_base_count = the total count of mapped base; Mapped_base_count_ratio = ratio of Mapped_base_count among samples; C>T_RNA_editing_count = total C>T RNA editing count; norm.C>T_RNA_editing_count = normalized to…
Sample_id	APOBEC	Dox conc. (μg/ml)	Mapped_base_count	Mapped_base_count_ratio	C>T_RNA_eidting_count	norm.C>T_RNA_eidting_count	recur.C>T_RNA_editing_count	Recurrent_events_freq.
A3A_1st_C3_0h_100ng_bat1-1	A3A	0	3941076730	1.26348	6399	262	160	0.610687
A3A_1st_C3_0h_100ng_bat1-2	A3A	0	7074847766	2.26815	9308	108	97	0.898148
A3A_1st_C3_0h_100ng_bat1-3	A3A	0	3297256395	1.05708	5750	182	123	0.675824
A3A_1st_C3_48h_100ng_bat1-1	A3A	0.1	6472083247	2.07491	15803	1355	1335	0.98524
A3A_1st_C3_48h_100ng_bat1-2	A3A	0.1	3937493453	1.26233	12064	1958	1773	0.905516
A3A_1st_C3_48h_100ng_bat1-3	A3A	0.1	5272832396	1.69044	13500	1184	1163	0.982264
A3A_1st_C3_48h_3ug_bat3-1	A3A	3	3640201307	1.16702	16633	5317	4047	0.761144
A3A_1st_C3_48h_3ug_bat3-2	A3A	3	3241041787	1.03906	15493	4594	3779	0.822595
A3A_1st_C3_48h_3ug_bat3-3	A3A	3	3119214835	1	15082	7247	4328	0.597213
A3B_1st_C5_0h_100ng_bat1-1	A3B	0	14509122344	4.65153	16774	175	155	0.885714
A3B_1st_C5_0h_100ng_bat1-2	A3B	0	12596100569	4.03823	15613	145	131	0.903448
A3B_1st_C5_0h_100ng_bat1-3	A3B	0	12509667561	4.01052	15327	153	146	0.954248
A3B_1st_C5_48h_100ng_bat1-1	A3B	0.1	10324582654	3.30999	36190	1391	1334	0.959022
A3B_1st_C5_48h_100ng_bat1-2	A3B	0.1	9485999223	3.04115	33563	1110	1076	0.969369
A3B_1st_C5_48h_100ng_bat1-3	A3B	0.1	9172787480	2.94074	32245	1317	1242	0.943052
A3B_1st_C5_48h_3ug_bat1-1	A3B	3	8338318652	2.67321	61008	4099	3118	0.760673
A3B_1st_C5_48h_3ug_bat1-2	A3B	3	8877982936	2.84622	62603	4510	3287	0.728825
A3B_1st_C5_48h_3ug_bat1-3	A3B	3	4165241322	1.33535	33896	5184	2984	0.575617
