# Supplementary material for: APOBEC3A drives deaminase mutagenesis in human gastric epithelium
Source: HighWire-hosted journal article supplement (doi:10.1101/gr.280338.124), 2025-08-26
Supplement: Supplemental_Table_S8.xlsx [file Supplemental_Table_S8.xlsx]

## Sheet: Supplemental Table S8
Supplemental Table S8. Summary of the recurrent A3A- and A3B-specific C>U RNA editing sites across the hGOiA3A and hGOiA3B lines.
The following data is reported for each hGOiA3A and hGOiA3B lines: APOBEC = APOBEC enzymes; Group = condition of samples; # of sample = the number of samples having the RNA editing site; # of sites = the number of C>U RNA editing sites.
APOBEC	Group	# of sample	# of sites
A3A	0μg/ml_specific	³2	5
A3A	0.1μg/ml_specific	2	7
A3A	0.1μg/ml_specific	3	0
A3A	3μg/ml_specific	2	1227
A3A	3μg/ml_specific	3	925
A3A	only_0.1μg/ml+3μg/ml	2	117
A3A	only_0.1μg/ml+3μg/ml	3	178
A3A	only_0.1μg/ml+3μg/ml	4	432
A3A	only_0.1μg/ml+3μg/ml	5	289
A3A	only_0.1μg/ml+3μg/ml	6	513
A3A	At_lest_one_0μg/ml	2	32
A3A	At_lest_one_0μg/ml	3	14
A3A	At_lest_one_0μg/ml	4	16
A3A	At_lest_one_0μg/ml	5	10
A3A	At_lest_one_0μg/ml	6	4
A3A	At_lest_one_0μg/ml	7	2
A3A	At_lest_one_0μg/ml	8	0
A3A	At_lest_one_0μg/ml	9	3
A3B	0μg/ml_specific	³2	5
A3B	0.1μg_specific	2	8
A3B	0.1μg_specific	3	1
A3B	3μg_specific	2	1036
A3B	3μg_specific	3	604
A3B	only_0.1μg/ml+3μg/ml	2	119
A3B	only_0.1μg/ml+3μg/ml	3	190
A3B	only_0.1μg/ml+3μg/ml	4	300
A3B	only_0.1μg/ml+3μg/ml	5	203
A3B	only_0.1μg/ml+3μg/ml	6	266
A3B	At_lest_one_0μg/ml	2	5
A3B	At_lest_one_0μg/ml	3	11
A3B	At_lest_one_0μg/ml	4	6
A3B	At_lest_one_0μg/ml	5	2
A3B	At_lest_one_0μg/ml	6	4
A3B	At_lest_one_0μg/ml	7	2
A3B	At_lest_one_0μg/ml	8	6
A3B	At_lest_one_0μg/ml	9	6
