# Supplementary material for: APOBEC3A drives deaminase mutagenesis in human gastric epithelium
Source: HighWire-hosted journal article supplement (doi:10.1101/gr.280338.124), 2025-08-26
Supplement: Supplemental_Table_S9.xlsx [file Supplemental_Table_S9.xlsx]

## Sheet: Supplemental Table S9
Supplemental Table S9. Summary of the simulation-adjusted number of clustered mutation events in the hGOiA3A clones and public cancer data.
The following data is reported for each sample: sample_id = sample identifier; tissue_class = source tissues; sub_project_code = abbreviations of tissue types; cluster_IMD_cutoff = baseline inter-mutation distances for identifying clustered mutation events; APOBEC-associated mutation = the number of single nucleotide variants corresponding to SBS2 and SBS13; adj.total APOBEC mutation event = the …
Sample_id	Tissue_class	Sub_project_code	Cluster_IMD_cutoff	APOBEC-associated mutation (SBS2+SBS13)	adj.total APOBEC mutation event	Type	adj.cluster_mutation_event	adj.cluster_mutation_freq
A3A_1st_C3_100ng-1	organoid	A3A	10000	872	820.14	omikli	20.21	0.0246
A3A_1st_C3_3ug-1	organoid	A3A	10000	635	608.75	omikli	12.77	0.021
A3A_1st_C3_3ug-2	organoid	A3A	3788	4573	4369.89	omikli	138.36	0.0317
A3A_1st_C3_3ug-3	organoid	A3A	7676	1753	1695.52	omikli	42.55	0.0251
A3A_1st_C3_3ug-4	organoid	A3A	6320	1998	1922.92	omikli	48.94	0.0254
A3A_1st_C3_3ug-5	organoid	A3A	6159	3282	3097.57	omikli	77.66	0.0251
A3A_C3_TP53KO_C3_100ng-1	organoid	A3A	10000	1298	1249.68	omikli	28.72	0.023
A3A_C3_TP53KO_C3_100ng-2	organoid	A3A	10000	1349	1237.6	omikli	61.7	0.0499
A3A_C3_TP53KO_C3_100ng-3	organoid	A3A	8191	2189	2072.99	omikli	68.09	0.0328
A3A_C3_TP53KO_C3_3ug-1	organoid	A3A	10000	524	518.32	omikli	5.32	0.0103
A3A_C3_TP53KO_C3_3ug-2	organoid	A3A	8191	2011	1873.23	omikli	55.32	0.0295
A3A_C3_TP53KO_C3_3ug-3	organoid	A3A	4095	3112	2960.71	omikli	89.38	0.0302
01658141-8398-4585-9f0f-8355dd9b0604	cancer	BRCA	484	15378	15100.4	omikli	424.86	0.0281
0250e6f7-2538-4d1f-a8ff-ca34a7057dde	cancer	ESAD	127	2533	2545.37	omikli	43.66	0.0172
08227616-02a5-46e8-9db1-f2d1d691ab23	cancer	HNSC	418	4170	4146.45	omikli	45.78	0.011
097a7d36-905b-72be-e050-11ac0d482c9a	cancer	BRCA	127	23691	25280.1	omikli	2480.07	0.0981
09bc8542-4ea1-4599-91b3-d606425b37e2	cancer	LUAD	511	3043	2984.44	omikli	57.02	0.0191
0c39c03a-ec84-42c6-be69-8e98bc7a9f5a	cancer	UCEC	104	12992	13343.2	omikli	533.19	0.04
0c7aca3f-e006-4de3-afc2-20b4f727d4fd	cancer	BLCA	511	4373	4220.93	omikli	180.82	0.0428
14bf9bfb-14d6-4cac-a556-828f680e8a15	cancer	LUAD	381	3949	3890.49	omikli	89.25	0.0229
190eb791-383d-4e27-870d-e470630843e7	cancer	HNSC	255	3741	3720.14	omikli	43.4	0.0117
1aff91a6-1b0f-4575-8f4b-4e064a50b886	cancer	HNSC	1023	1435	1396.01	omikli	21.83	0.0156
1c0e384f-7254-4afe-93c0-b3fc6c6a7894	cancer	BRCA	127	1714	1707.24	omikli	21.83	0.0128
1c3df485-8e75-4378-87f6-c6463a520624	cancer	LUSC	210	5563	5589.56	omikli	106.12	0.019
1db83e80-bdf7-4d8d-8008-bd8406d641fc	cancer	HNSC	511	5074	4988.05	omikli	193.86	0.0389
1fdab6a6-7346-4229-aa8d-5dbd258f0c60	cancer	ORCA	511	1659	1622.45	omikli	61.9	0.0382
1ff155dd-deb4-44e0-b3a2-e4875b618435	cancer	ORCA	511	4695	4658.91	omikli	104.26	0.0224
1fff8b62-534b-4d71-a65f-e5f93b8b50ed	cancer	HNSC	255	2226	2230.22	omikli	17.87	0.008
2045c788-9ea8-4ea5-a5e3-65fc16a62adb	cancer	LUSC	31	39151	41520.2	omikli	2812.23	0.0677
21205681-a0c7-48d0-81d4-0b7ef31158cf	cancer	HNSC	95	31015	31654.9	omikli	981.68	0.031
293a2f0a-4846-4c7c-b8b1-bb741c8d3275	cancer	ESAD	47	5953	6080.94	omikli	163.94	0.027
29fc38aa-f367-46a3-a14d-a5f657ad0caa	cancer	HNSC	1873	685	669.31	omikli	16.31	0.0244
2b142863-b963-4cc9-8f8f-c72503c93390	cancer	BLCA	511	15482	14990.6	omikli	690.71	0.0461
2b78de4e-4c8b-4adf-a058-3dae797e7881	cancer	UCEC	471	833	831.53	omikli	8.53	0.0103
301d6ce3-4099-4c1d-8e50-c04b7ce91450	cancer	BLCA	511	11430	11268.6	omikli	405.63	0.036
34881c6b-f59f-42c0-9f29-9c5c47262ae6	cancer	LUSC	240	6223	6250.09	omikli	130.76	0.0209
369c06f2-8904-49cb-99d1-dd297ed0cd0c	cancer	LUSC	255	5027	5029.4	omikli	142.98	0.0284
384ef419-ee94-4563-9237-236fddeb4b64	cancer	ESAD	255	609	604.9	omikli	2.55	0.0042
3b20d548-2a7d-4031-85a1-425ca7201d7a	cancer	LUAD	63	27453	28121.5	omikli	912.46	0.0324
41f140b8-72b9-4ae3-8b25-6144d9f94d0f	cancer	BRCA	3949	1836	1770.89	omikli	47.89	0.027
448fe471-3f4e-4dc8-a4e0-6f147dc93abe	cancer	BLCA	511	26863	25901.6	omikli	1544.33	0.0596
45a7949d-e63f-4956-866c-df51257032de	cancer	BLCA	511	10281	10073.3	omikli	465.91	0.0463
45e16b70-c3ec-493e-86d1-505ffdf5056c	cancer	LUSC	127	13204	13318.9	omikli	227.05	0.017
460f7427-ebcf-404b-9e9e-e0278d0bca95	cancer	UCEC	206	7748	7716.07	omikli	59.82	0.0078
46693a2b-5105-4770-a9e1-031dfedeb694	cancer	LUAD	211	3084	3086.8	omikli	58.74	0.019
46d35b82-e1b7-4d35-be5e-3a70fd47e421	cancer	HNSC	127	9590	9719.51	omikli	244.51	0.0252
49dec0c2-8e75-4f44-a253-82b2ea605890	cancer	LUAD	127	10001	10170.4	omikli	305.64	0.0301
4c2ad4a0-5d57-4e27-9f35-058b2f205f50	cancer	LUSC	112	8529	8592.82	omikli	96.6	0.0112
4c3840df-9824-40db-879e-6d24adc8c155	cancer	LUSC	255	4290	4309.03	omikli	112.34	0.0261
5046f1b4-9d95-4841-ba30-691fa44719a2	cancer	HNSC	196	6330	6336.85	omikli	96.29	0.0152
5193a482-6ed9-4504-bd7c-c8b9e4103577	cancer	HNSC	250	34079	34363.2	omikli	1455.65	0.0424
54e78de0-d357-4125-a904-ab35e461572b	cancer	HNSC	511	959	957.15	omikli	8.15	0.0085
554b9439-7e11-43ec-8bc3-448c59100b9e	cancer	UCEC	900	1722	1685.11	omikli	21.47	0.0127
5b7d5767-2037-4175-aec9-886776343181	cancer	BRCA	2047	1955	1718.72	omikli	39.98	0.0233
6c8e9197-fd16-4fed-bfda-e349cab26314	cancer	BRCA	1515	1521	1337.37	omikli	45.68	0.0342
708e21ac-f529-4461-bc4f-d3a194a92b80	cancer	ESAD	448	1522	1513.03	omikli	7.03	0.0046
7158c9fd-a633-4fef-aa23-bd285f2a87a8	cancer	HNSC	3236	994	914.1	omikli	43.68	0.0478
74b57d2c-a83f-4798-b86b-a533975e4cc0	cancer	BRCA	1023	2334	2211.72	omikli	35.17	0.0159
7731ef7f-25bd-42f5-9a20-be249306a711	cancer	LUSC	458	6060	5992.05	omikli	171.63	0.0286
77c022d3-2f29-49d3-a1df-cc2e9407fd7f	cancer	ESAD	511	522	521.63	omikli	1.63	0.0031
7ac0b303-d685-4fa5-bfec-34d2ba1dbc8e	cancer	LUSC	63	10566	11119.9	omikli	697.76	0.0627
7adcea71-1aed-450c-b0ff-b9d9820c6153	cancer	ESAD	255	2295	2288.77	omikli	12.77	0.0056
7d2a22eb-7344-4cba-ad7d-94c3f9ef3d7c	cancer	BLCA	2047	5934	5538.09	omikli	223.65	0.0404
804ffa2e-158b-447d-945c-707684134c87	cancer	BLCA	511	1485	1458.47	omikli	60.27	0.0413
81598359-24d5-4a8b-a6e6-7a6f94289119	cancer	HNSC	762	1248	1228.75	omikli	10.75	0.0088
8294a969-59a1-4d3b-895b-f07e96bf9f7a	cancer	HNSC	255	719	721.9	omikli	2.55	0.0035
83eca7b5-45bb-44c0-8afe-36f8988d0078	cancer	HNSC	1016	5393	5193.7	omikli	166.47	0.0321
8691c87f-2468-44bb-a670-3dccd6da33c6	cancer	BRCA	511	11605	11492.8	omikli	226.44	0.0197
8c619cbc-9e91-4716-9711-5236e55d8f46	cancer	BLCA	2047	3096	2901.42	omikli	105.88	0.0365
8cf9b32d-3d6f-4898-8c7a-89511b754021	cancer	LUSC	4095	2914	2638.58	omikli	146.84	0.0557
8dd14f0e-8601-4aa1-864c-3c49e768cdd1	cancer	UCEC	255	946	943.01	omikli	7.66	0.0081
926a04de-ef57-4271-91db-e90de8aa8a1a	cancer	ESAD	100	1091	1096.87	omikli	15.87	0.0145
94108975-b7a0-40ba-ad39-e44cc62e8cc0	cancer	BLCA	110	23694	24380.7	omikli	1131.97	0.0464
96dc785c-8417-4813-8d15-c32b22d78b74	cancer	LUSC	127	7829	7936.11	omikli	170.29	0.0215
96f337d2-cec4-4484-87cd-ab2109d2bf50	cancer	UCEC	255	1476	1477.21	omikli	10.21	0.0069
973d0577-8ca4-44a1-817f-1d3c1bada151	cancer	BLCA	447	3178	3146.92	omikli	89.69	0.0285
987d41ee-6bab-490c-b0f2-bf28c0089de9	cancer	BRCA	511	2377	2323.16	omikli	55.39	0.0238
9ddf2119-a222-4fa5-a9f3-0bec7eeea36b	cancer	BRCA	255	3507	3497.36	omikli	22.98	0.0066
9fb6b7be-0084-48f7-a256-6d170e72e97f	cancer	ORCA	1544	745	732.14	omikli	7.78	0.0106
a284fe9d-9afd-4472-8d70-243ca9be5c2c	cancer	ESAD	63	6629	6810.37	omikli	268.37	0.0394
a762dd44-a8ac-4269-8163-bbf6d0f8d4b3	cancer	LUSC	244	6013	6096.95	omikli	503.56	0.0826
a8041e86-071e-46cd-8fb5-7ecdc1ab0553	cancer	HNSC	1824	1384	1274.81	omikli	38.16	0.0299
ab923db7-54e8-4a50-b7fd-c2b4b300041e	cancer	HNSC	194	9366	9455.68	omikli	256.72	0.0271
abd2d959-d5ed-4eb3-9759-67eb1aa23325	cancer	BLCA	1023	4852	4559.15	omikli	180.69	0.0396
acc629cb-ad03-4cec-9b21-922e4932ef3e	cancer	BLCA	1023	8971	8402.87	omikli	344.4	0.041
b537bc07-9998-49f4-bbbe-5b617152bfd9	cancer	HNSC	1566	876	868.65	omikli	6.65	0.0077
b73523d7-f5a5-4140-8537-4df4d1ecf465	cancer	BLCA	127	29900	30869.5	omikli	1803.29	0.0584
b757a040-3c9e-45e7-a045-9cd08db11d62	cancer	ESAD	57	3441	3513.02	omikli	58.09	0.0165
b7f11036-7ac4-41bc-a9a4-64162725fdfc	cancer	LUAD	202	20742	20904.9	omikli	616.26	0.0295
b86e88e7-0d5f-4b32-a35f-dc97251ab990	cancer	HNSC	932	2704	2597.24	omikli	84.87	0.0327
b8f3137e-5e92-4a56-90d4-884a4ed2ef9c	cancer	ESAD	784	1377	1312.02	omikli	75.74	0.0577
ba096d4f-5a6c-4c31-ae03-e7483cf58c38	cancer	ESAD	235	4515	4515.72	omikli	37.94	0.0084
bcc819eb-f4d8-4ddc-9fdc-a6307fb6741b	cancer	ORCA	988	1533	1521.15	omikli	17.15	0.0113
bce88385-4a1b-4a8c-920c-060f6a2675d4	cancer	LUAD	209	8300	8360.67	omikli	195.25	0.0234
c1b44966-0f72-4c4f-8783-ab3ffe7f17b2	cancer	STAD	1665	609	562.42	omikli	12.11	0.0215
c76f7fcc-2748-4b6d-805e-d21652dd5e3a	cancer	HNSC	255	4454	4445.97	omikli	61.28	0.0138
cc19a480-9c66-4ee8-a0c0-921acac02689	cancer	UCEC	1023	540	482.16	omikli	13.34	0.0277
cc4f9175-a8c8-424a-99d7-8bd11cae0e52	cancer	BRCA	2047	4212	4001.99	omikli	124.25	0.031
cda1a403-16b6-487c-a82a-c377d1d0f89d	cancer	BLCA	433	32140	31700.1	omikli	1534.27	0.0484
d3709eea-ca2a-49ac-b79c-871a5473d450	cancer	HNSC	427	8563	8477.23	omikli	352.47	0.0416
d4615ca0-b5c7-4a5c-8593-bd50034a78ae	cancer	BLCA	255	2115	2116.66	omikli	7.66	0.0036
d54ca81c-1bcc-41ea-b17a-9f7249ebe9c1	cancer	LUSC	378	1301	1266.85	omikli	13.65	0.0108
d8c6d4b8-f279-4edc-aaa3-a1cc266aec4d	cancer	BRCA	1023	6408	6222.94	omikli	115.21	0.0185
da910f22-126e-41dc-be6b-47c8f69ad106	cancer	ESAD	63	1479	1504.34	omikli	38.34	0.0255
db45d81f-695c-4f99-beea-6dbec1ff47fc	cancer	BRCA	255	13182	13185.7	omikli	316.59	0.024
dd67dec6-35dd-4efe-b913-ed4884855365	cancer	HNSC	936	1087	1066.79	omikli	14.96	0.014
ddc7377d-82c3-480a-be3c-3d1da52c77d4	cancer	BRCA	255	29414	29444.4	omikli	919.13	0.0312
de8ef60b-4dbe-4aa8-adef-6f58cdfada29	cancer	HNSC	255	2406	2408.32	omikli	22.98	0.0095
dec775c5-7d9a-4dc5-b399-dc4b7ba49d73	cancer	UCEC	255	4538	4545.31	omikli	53.62	0.0118
ded8b673-53df-4038-a375-7cd0fd2a1b9f	cancer	ESAD	217	1327	1331.38	omikli	14.38	0.0108
df8a913c-5160-4fc5-950d-7c890e24e820	cancer	BLCA	477	18446	17785.8	omikli	958.41	0.0539
dfa20d2d-1ba3-476a-b4b9-21d21470bee2	cancer	HNSC	511	25988	24804.2	omikli	1752.85	0.0707
e2e6a409-b64d-463c-ac3b-e7987a3124f0	cancer	ORCA	255	6378	6398.57	omikli	153.19	0.0239
e52ffa79-557a-4024-81f3-f3826c227ec5	cancer	HNSC	237	6638	6655.75	omikli	129.28	0.0194
e6c78a98-f45b-482b-a551-4f11b8c1ff8b	cancer	BLCA	2047	5386	4876.89	omikli	200.96	0.0412
e7d74d34-3255-4c20-90fd-b105e6e229c8	cancer	UCEC	1023	1637	1585.41	omikli	23.04	0.0145
e7ebc6fb-0926-4c8a-a67b-0c6b9c1ffaba	cancer	LUSC	255	9750	9763.52	omikli	377.86	0.0387
e9cb8877-8e83-46c0-93f0-ea20530c9400	cancer	LUSC	102	6662	6748.93	omikli	135.4	0.0201
ea6efcd1-11de-45f0-8bde-f1c06ad27e79	cancer	UCEC	818	1675	1649.7	omikli	15.68	0.0095
ec474dfa-527c-44f3-9224-bf1c858cabfc	cancer	ESAD	126	1202	1206.79	omikli	8.79	0.0073
ef673d3d-2031-4036-ba25-4bc7ef04075b	cancer	HNSC	4095	3801	3089.02	omikli	208.56	0.0675
f35f7712-d5c6-47f6-98ed-704edbbc1e19	cancer	ORCA	236	16670	16777.2	omikli	453.91	0.0271
f389176f-d8f3-45c2-aae4-7378a3d6fc7f	cancer	BLCA	1023	1382	1268.26	omikli	35.17	0.0277
f393bb01-6ed7-9533-e040-11ac0d484521	cancer	BRCA	1023	989	977.37	omikli	3.64	0.0037
f393bb08-5b50-e009-e040-11ac0d484537	cancer	BRCA	2047	992	842.15	omikli	19.45	0.0231
f393bb0a-9b20-a0e5-e040-11ac0d48454e	cancer	BRCA	2047	925	837.05	omikli	10.8	0.0129
f393bb0a-df7d-645c-e040-11ac0d484550	cancer	BRCA	3993	3118	2849.96	omikli	89.39	0.0314
f393bb0c-4178-ca4a-e040-11ac0d48455f	cancer	BRCA	2935	656	645.55	omikli	7.47	0.0116
f6114c69-71a1-47d5-9b28-b0227b1872f7	cancer	BRCA	4095	904	619.86	omikli	12.77	0.0206
f7b84bac-f161-9eee-e040-11ac0c4847ed	cancer	BRCA	2047	1719	1672.12	omikli	33.49	0.02
f7c7373c-1972-4968-e040-11ac0d486e80	cancer	BRCA	53	54184	55591.1	omikli	1801.1	0.0324
f7d128d2-3964-e3bc-e040-11ac0d481667	cancer	BRCA	4095	940	908.29	omikli	20.22	0.0223
f7d7b3db-02af-61cb-e040-11ac0c480c03	cancer	BRCA	2047	965	955.56	omikli	7.56	0.0079
f7dcc2e4-1fc4-4b39-bc6a-720e66116d68	cancer	UCEC	63	22569	22793.7	omikli	306.71	0.0135
f7ed28a6-8f5f-e87b-e040-11ac0c48120e	cancer	BRCA	4095	586	542.36	omikli	20.22	0.0373
f7f3e156-0dde-72b9-e040-11ac0d48542c	cancer	BRCA	919	1230	1139.56	omikli	21.32	0.0187
f8f749b7-547d-49fa-9da2-44eed962b6fd	cancer	BRCA	1767	4637	4404.4	omikli	129.03	0.0293
fb8b5ff5-4164-4276-b75b-b0ee6bda7329	cancer	ORCA	511	5633	5526.51	omikli	215.03	0.0389
fb9135d9-2acf-41dd-8552-359e6b8c9470	cancer	BRCA	511	2977	2867.16	omikli	55.39	0.0193
fc447d4f-2532-c8ea-e040-11ac0c48469f	cancer	BRCA	511	551	541.92	omikli	17.92	0.0331
fc447d55-95d8-0b34-e040-11ac0d483afa	cancer	BRCA	1023	802	785.79	omikli	6.06	0.0077
fc447d56-0d53-e0c3-e040-11ac0c4846a8	cancer	BRCA	377	5316	5311.97	omikli	21.49	0.004
fc8130df-3225-3f96-e040-11ac0d485dfe	cancer	BRCA	1023	10987	10594.7	omikli	331.06	0.0312
fc8130df-6bec-7627-e040-11ac0d485e04	cancer	BRCA	511	1498	1493.66	omikli	14.66	0.0098
fc8130df-8ec8-5b1e-e040-11ac0d485e06	cancer	BRCA	234	13368	13437.1	omikli	312.67	0.0233
fc8130df-e399-e34d-e040-11ac0c483279	cancer	BRCA	2047	6682	6300.28	omikli	245.26	0.0389
fc8130e0-08dd-b996-e040-11ac0c48327b	cancer	BRCA	3969	826	727.06	omikli	14.9	0.0205
fc8130e0-096a-b991-e040-11ac0c48327d	cancer	BRCA	127	10089	10568.5	omikli	794.67	0.0752
fc8130e0-09f1-b964-e040-11ac0c48326e	cancer	BRCA	3538	782	706.02	omikli	13.84	0.0196
fc8130e0-0f1a-b6eb-e040-11ac0c48328f	cancer	BRCA	1023	1945	1804.56	omikli	18.19	0.0101
fc8130e0-a538-dda3-e040-11ac0c483264	cancer	BRCA	1691	1397	1277.28	omikli	9.89	0.0077
fc8130e0-a8b4-d80d-e040-11ac0c483272	cancer	BRCA	1571	1407	1375.62	omikli	18.85	0.0137
fc81312a-d451-38fb-e040-11ac0c4832a4	cancer	BRCA	2047	970	948.33	omikli	15.13	0.016
fd504153-3cf6-44b9-99d5-21961ebac188	cancer	UCEC	511	558	550.14	omikli	3.26	0.0059
fe04d042-a4cc-4a14-8197-415ea40951aa	cancer	BRCA	409	4682	4668.37	omikli	85.37	0.0183
ffdd4feb-aca3-4104-b1e8-954d705a6450	cancer	BLCA	511	2555	2486.08	omikli	109.15	0.0439
25f07374-313a-4100-9a60-3d21d2988fca	cancer	GACA	31	1352	1352	omikli	0	0
ca137611-533a-4d20-a85d-8e4c3a1eab2d	cancer	ORCA	511	868	868	omikli	0	0
A3A_1st_C3_100ng-1	organoid	A3A	10000	872	820.14	kataegis	7.92	0.0097
A3A_1st_C3_3ug-1	organoid	A3A	10000	635	608.75	kataegis	1.98	0.0033
A3A_1st_C3_3ug-2	organoid	A3A	3788	4573	4369.89	kataegis	16.53	0.0038
A3A_1st_C3_3ug-3	organoid	A3A	7676	1753	1695.52	kataegis	3.97	0.0023
A3A_C3_3ug-4	organoid	A3A	6320	1998	1922.92	kataegis	3.98	0.0021
A3A_C3_3ug-5	organoid	A3A	6159	3282	3097.57	kataegis	20.91	0.0068
A3A_C3_TP53_C3_100ng-1	organoid	A3A	10000	1298	1249.68	kataegis	4.95	0.004
A3A_C3_TP53_C3_100ng-2	organoid	A3A	10000	1349	1237.6	kataegis	10.89	0.0088
A3A_C3_TP53_C3_100ng-3	organoid	A3A	8191	2189	2072.99	kataegis	10.9	0.0053
A3A_C3_TP53_C3_3ug-1	organoid	A3A	10000	524	518.32	kataegis	0	0
A3A_C3_TP53_C3_3ug-2	organoid	A3A	8191	2011	1873.23	kataegis	9.91	0.0053
A3A_C3_TP53_C3_3ug-3	organoid	A3A	4095	3112	2960.71	kataegis	14.32	0.0048
01658141-8398-4585-9f0f-8355dd9b0604	cancer	BRCA	484	15378	15100.4	kataegis	96.58	0.0064
0250e6f7-2538-4d1f-a8ff-ca34a7057dde	cancer	ESAD	127	2533	2545.37	kataegis	10.7	0.0042
08227616-02a5-46e8-9db1-f2d1d691ab23	cancer	HNSC	418	4170	4146.45	kataegis	13.67	0.0033
097a7d36-905b-72be-e050-11ac0d482c9a	cancer	BRCA	127	23691	25280.1	kataegis	652.99	0.0258
09bc8542-4ea1-4599-91b3-d606425b37e2	cancer	LUAD	511	3043	2984.44	kataegis	14.43	0.0048
0c39c03a-ec84-42c6-be69-8e98bc7a9f5a	cancer	UCEC	104	12992	13343.2	kataegis	52.98	0.004
0c7aca3f-e006-4de3-afc2-20b4f727d4fd	cancer	BLCA	511	4373	4220.93	kataegis	98.1	0.0232
14bf9bfb-14d6-4cac-a556-828f680e8a15	cancer	LUAD	381	3949	3890.49	kataegis	22.23	0.0057
190eb791-383d-4e27-870d-e470630843e7	cancer	HNSC	255	3741	3720.14	kataegis	26.73	0.0072
1aff91a6-1b0f-4575-8f4b-4e064a50b886	cancer	HNSC	1023	1435	1396.01	kataegis	5.18	0.0037
1c0e384f-7254-4afe-93c0-b3fc6c6a7894	cancer	BRCA	127	1714	1707.24	kataegis	21.41	0.0125
1c3df485-8e75-4378-87f6-c6463a520624	cancer	LUSC	210	5563	5589.56	kataegis	6.44	0.0012
1db83e80-bdf7-4d8d-8008-bd8406d641fc	cancer	HNSC	511	5074	4988.05	kataegis	20.2	0.004
1fdab6a6-7346-4229-aa8d-5dbd258f0c60	cancer	ORCA	511	1659	1622.45	kataegis	11.54	0.0071
1ff155dd-deb4-44e0-b3a2-e4875b618435	cancer	ORCA	511	4695	4658.91	kataegis	8.66	0.0019
1fff8b62-534b-4d71-a65f-e5f93b8b50ed	cancer	HNSC	255	2226	2230.22	kataegis	5.35	0.0024
2045c788-9ea8-4ea5-a5e3-65fc16a62adb	cancer	LUSC	31	39151	41520.2	kataegis	0	0
21205681-a0c7-48d0-81d4-0b7ef31158cf	cancer	HNSC	95	31015	31654.9	kataegis	29.24	0.0009
293a2f0a-4846-4c7c-b8b1-bb741c8d3275	cancer	ESAD	47	5953	6080.94	kataegis	0	0
29fc38aa-f367-46a3-a14d-a5f657ad0caa	cancer	HNSC	1873	685	669.31	kataegis	0	0
2b142863-b963-4cc9-8f8f-c72503c93390	cancer	BLCA	511	15482	14990.6	kataegis	253.91	0.0169
2b78de4e-4c8b-4adf-a058-3dae797e7881	cancer	UCEC	471	833	831.53	kataegis	0	0
301d6ce3-4099-4c1d-8e50-c04b7ce91450	cancer	BLCA	511	11430	11268.6	kataegis	51.94	0.0046
34881c6b-f59f-42c0-9f29-9c5c47262ae6	cancer	LUSC	240	6223	6250.09	kataegis	11.33	0.0018
369c06f2-8904-49cb-99d1-dd297ed0cd0c	cancer	LUSC	255	5027	5029.4	kataegis	37.42	0.0074
384ef419-ee94-4563-9237-236fddeb4b64	cancer	ESAD	255	609	604.9	kataegis	5.35	0.0088
3b20d548-2a7d-4031-85a1-425ca7201d7a	cancer	LUAD	63	27453	28121.5	kataegis	0	0
41f140b8-72b9-4ae3-8b25-6144d9f94d0f	cancer	BRCA	3949	1836	1770.89	kataegis	0	0
448fe471-3f4e-4dc8-a4e0-6f147dc93abe	cancer	BLCA	511	26863	25901.6	kataegis	421.26	0.0163
45a7949d-e63f-4956-866c-df51257032de	cancer	BLCA	511	10281	10073.3	kataegis	66.36	0.0066
45e16b70-c3ec-493e-86d1-505ffdf5056c	cancer	LUSC	127	13204	13318.9	kataegis	42.82	0.0032
460f7427-ebcf-404b-9e9e-e0278d0bca95	cancer	UCEC	206	7748	7716.07	kataegis	26.25	0.0034
46693a2b-5105-4770-a9e1-031dfedeb694	cancer	LUAD	211	3084	3086.8	kataegis	32.05	0.0104
46d35b82-e1b7-4d35-be5e-3a70fd47e421	cancer	HNSC	127	9590	9719.51	kataegis	0	0
49dec0c2-8e75-4f44-a253-82b2ea605890	cancer	LUAD	127	10001	10170.4	kataegis	10.7	0.0011
4c2ad4a0-5d57-4e27-9f35-058b2f205f50	cancer	LUSC	112	8529	8592.82	kataegis	12.23	0.0014
4c3840df-9824-40db-879e-6d24adc8c155	cancer	LUSC	255	4290	4309.03	kataegis	10.69	0.0025
5046f1b4-9d95-4841-ba30-691fa44719a2	cancer	HNSC	196	6330	6336.85	kataegis	27.56	0.0043
5193a482-6ed9-4504-bd7c-c8b9e4103577	cancer	HNSC	250	34079	34363.2	kataegis	152.53	0.0044
54e78de0-d357-4125-a904-ab35e461572b	cancer	HNSC	511	959	957.15	kataegis	0	0
554b9439-7e11-43ec-8bc3-448c59100b9e	cancer	UCEC	900	1722	1685.11	kataegis	5.64	0.0033
5b7d5767-2037-4175-aec9-886776343181	cancer	BRCA	2047	1955	1718.72	kataegis	21.74	0.0126
6c8e9197-fd16-4fed-bfda-e349cab26314	cancer	BRCA	1515	1521	1337.37	kataegis	20.69	0.0155
708e21ac-f529-4461-bc4f-d3a194a92b80	cancer	ESAD	448	1522	1513.03	kataegis	0	0
7158c9fd-a633-4fef-aa23-bd285f2a87a8	cancer	HNSC	3236	994	914.1	kataegis	7.42	0.0081
74b57d2c-a83f-4798-b86b-a533975e4cc0	cancer	BRCA	1023	2334	2211.72	kataegis	34.55	0.0156
7731ef7f-25bd-42f5-9a20-be249306a711	cancer	LUSC	458	6060	5992.05	kataegis	47.42	0.0079
77c022d3-2f29-49d3-a1df-cc2e9407fd7f	cancer	ESAD	511	522	521.63	kataegis	0	0
7ac0b303-d685-4fa5-bfec-34d2ba1dbc8e	cancer	LUSC	63	10566	11119.9	kataegis	117.14	0.0105
7adcea71-1aed-450c-b0ff-b9d9820c6153	cancer	ESAD	255	2295	2288.77	kataegis	0	0
7d2a22eb-7344-4cba-ad7d-94c3f9ef3d7c	cancer	BLCA	2047	5934	5538.09	kataegis	37.44	0.0068
804ffa2e-158b-447d-945c-707684134c87	cancer	BLCA	511	1485	1458.47	kataegis	20.2	0.0138
81598359-24d5-4a8b-a6e6-7a6f94289119	cancer	HNSC	762	1248	1228.75	kataegis	0	0
8294a969-59a1-4d3b-895b-f07e96bf9f7a	cancer	HNSC	255	719	721.9	kataegis	5.35	0.0074
83eca7b5-45bb-44c0-8afe-36f8988d0078	cancer	HNSC	1016	5393	5193.7	kataegis	31.23	0.006
8691c87f-2468-44bb-a670-3dccd6da33c6	cancer	BRCA	511	11605	11492.8	kataegis	17.31	0.0015
8c619cbc-9e91-4716-9711-5236e55d8f46	cancer	BLCA	2047	3096	2901.42	kataegis	20.53	0.0071
8cf9b32d-3d6f-4898-8c7a-89511b754021	cancer	LUSC	4095	2914	2638.58	kataegis	32.74	0.0124
8dd14f0e-8601-4aa1-864c-3c49e768cdd1	cancer	UCEC	255	946	943.01	kataegis	5.35	0.0057
926a04de-ef57-4271-91db-e90de8aa8a1a	cancer	ESAD	100	1091	1096.87	kataegis	0	0
94108975-b7a0-40ba-ad39-e44cc62e8cc0	cancer	BLCA	110	23694	24380.7	kataegis	124.68	0.0051
96dc785c-8417-4813-8d15-c32b22d78b74	cancer	LUSC	127	7829	7936.11	kataegis	42.82	0.0054
96f337d2-cec4-4484-87cd-ab2109d2bf50	cancer	UCEC	255	1476	1477.21	kataegis	0	0
973d0577-8ca4-44a1-817f-1d3c1bada151	cancer	BLCA	447	3178	3146.92	kataegis	3.23	0.001
987d41ee-6bab-490c-b0f2-bf28c0089de9	cancer	BRCA	511	2377	2323.16	kataegis	5.77	0.0025
9ddf2119-a222-4fa5-a9f3-0bec7eeea36b	cancer	BRCA	255	3507	3497.36	kataegis	21.39	0.0061
9fb6b7be-0084-48f7-a256-6d170e72e97f	cancer	ORCA	1544	745	732.14	kataegis	1.37	0.0019
a284fe9d-9afd-4472-8d70-243ca9be5c2c	cancer	ESAD	63	6629	6810.37	kataegis	0	0
a762dd44-a8ac-4269-8163-bbf6d0f8d4b3	cancer	LUSC	244	6013	6096.95	kataegis	178.39	0.0293
a8041e86-071e-46cd-8fb5-7ecdc1ab0553	cancer	HNSC	1824	1384	1274.81	kataegis	12.65	0.0099
ab923db7-54e8-4a50-b7fd-c2b4b300041e	cancer	HNSC	194	9366	9455.68	kataegis	6.96	0.0007
abd2d959-d5ed-4eb3-9759-67eb1aa23325	cancer	BLCA	1023	4852	4559.15	kataegis	41.46	0.0091
acc629cb-ad03-4cec-9b21-922e4932ef3e	cancer	BLCA	1023	8971	8402.87	kataegis	117.47	0.014
b537bc07-9998-49f4-bbbe-5b617152bfd9	cancer	HNSC	1566	876	868.65	kataegis	0	0
b73523d7-f5a5-4140-8537-4df4d1ecf465	cancer	BLCA	127	29900	30869.5	kataegis	139.16	0.0045
b757a040-3c9e-45e7-a045-9cd08db11d62	cancer	ESAD	57	3441	3513.02	kataegis	52.93	0.0151
b7f11036-7ac4-41bc-a9a4-64162725fdfc	cancer	LUAD	202	20742	20904.9	kataegis	93.65	0.0045
b86e88e7-0d5f-4b32-a35f-dc97251ab990	cancer	HNSC	932	2704	2597.24	kataegis	18.36	0.0071
b8f3137e-5e92-4a56-90d4-884a4ed2ef9c	cancer	ESAD	784	1377	1312.02	kataegis	8.29	0.0063
ba096d4f-5a6c-4c31-ae03-e7483cf58c38	cancer	ESAD	235	4515	4515.72	kataegis	5.78	0.0013
bcc819eb-f4d8-4ddc-9fdc-a6307fb6741b	cancer	ORCA	988	1533	1521.15	kataegis	0	0
bce88385-4a1b-4a8c-920c-060f6a2675d4	cancer	LUAD	209	8300	8360.67	kataegis	19.41	0.0023
c1b44966-0f72-4c4f-8783-ab3ffe7f17b2	cancer	STAD	1665	609	562.42	kataegis	1.32	0.0023
c76f7fcc-2748-4b6d-805e-d21652dd5e3a	cancer	HNSC	255	4454	4445.97	kataegis	10.69	0.0024
cc19a480-9c66-4ee8-a0c0-921acac02689	cancer	UCEC	1023	540	482.16	kataegis	13.82	0.0287
cc4f9175-a8c8-424a-99d7-8bd11cae0e52	cancer	BRCA	2047	4212	4001.99	kataegis	21.74	0.0054
cda1a403-16b6-487c-a82a-c377d1d0f89d	cancer	BLCA	433	32140	31700.1	kataegis	281.87	0.0089
d3709eea-ca2a-49ac-b79c-871a5473d450	cancer	HNSC	427	8563	8477.23	kataegis	63.76	0.0075
d4615ca0-b5c7-4a5c-8593-bd50034a78ae	cancer	BLCA	255	2115	2116.66	kataegis	0	0
d54ca81c-1bcc-41ea-b17a-9f7249ebe9c1	cancer	LUSC	378	1301	1266.85	kataegis	11.19	0.0088
d8c6d4b8-f279-4edc-aaa3-a1cc266aec4d	cancer	BRCA	1023	6408	6222.94	kataegis	20.73	0.0033
da910f22-126e-41dc-be6b-47c8f69ad106	cancer	ESAD	63	1479	1504.34	kataegis	0	0
db45d81f-695c-4f99-beea-6dbec1ff47fc	cancer	BRCA	255	13182	13185.7	kataegis	32.08	0.0024
dd67dec6-35dd-4efe-b913-ed4884855365	cancer	HNSC	936	1087	1066.79	kataegis	1.83	0.0017
ddc7377d-82c3-480a-be3c-3d1da52c77d4	cancer	BRCA	255	29414	29444.4	kataegis	96.24	0.0033
de8ef60b-4dbe-4aa8-adef-6f58cdfada29	cancer	HNSC	255	2406	2408.32	kataegis	5.35	0.0022
dec775c5-7d9a-4dc5-b399-dc4b7ba49d73	cancer	UCEC	255	4538	4545.31	kataegis	10.69	0.0024
ded8b673-53df-4038-a375-7cd0fd2a1b9f	cancer	ESAD	217	1327	1331.38	kataegis	0	0
df8a913c-5160-4fc5-950d-7c890e24e820	cancer	BLCA	477	18446	17785.8	kataegis	354.4	0.0199
dfa20d2d-1ba3-476a-b4b9-21d21470bee2	cancer	HNSC	511	25988	24804.2	kataegis	594.38	0.024
e2e6a409-b64d-463c-ac3b-e7987a3124f0	cancer	ORCA	255	6378	6398.57	kataegis	21.39	0.0033
e52ffa79-557a-4024-81f3-f3826c227ec5	cancer	HNSC	237	6638	6655.75	kataegis	11.46	0.0017
e6c78a98-f45b-482b-a551-4f11b8c1ff8b	cancer	BLCA	2047	5386	4876.89	kataegis	80.93	0.0166
e7d74d34-3255-4c20-90fd-b105e6e229c8	cancer	UCEC	1023	1637	1585.41	kataegis	10.37	0.0065
e7ebc6fb-0926-4c8a-a67b-0c6b9c1ffaba	cancer	LUSC	255	9750	9763.52	kataegis	133.66	0.0137
e9cb8877-8e83-46c0-93f0-ea20530c9400	cancer	LUSC	102	6662	6748.93	kataegis	13.53	0.002
ea6efcd1-11de-45f0-8bde-f1c06ad27e79	cancer	UCEC	818	1675	1649.7	kataegis	4.02	0.0024
ec474dfa-527c-44f3-9224-bf1c858cabfc	cancer	ESAD	126	1202	1206.79	kataegis	0	0
ef673d3d-2031-4036-ba25-4bc7ef04075b	cancer	HNSC	4095	3801	3089.02	kataegis	109.46	0.0354
f35f7712-d5c6-47f6-98ed-704edbbc1e19	cancer	ORCA	236	16670	16777.2	kataegis	40.28	0.0024
f389176f-d8f3-45c2-aae4-7378a3d6fc7f	cancer	BLCA	1023	1382	1268.26	kataegis	12.09	0.0095
f393bb01-6ed7-9533-e040-11ac0d484521	cancer	BRCA	1023	989	977.37	kataegis	1.73	0.0018
f393bb08-5b50-e009-e040-11ac0d484537	cancer	BRCA	2047	992	842.15	kataegis	15.7	0.0186
f393bb0a-9b20-a0e5-e040-11ac0d48454e	cancer	BRCA	2047	925	837.05	kataegis	7.25	0.0087
f393bb0a-df7d-645c-e040-11ac0d484550	cancer	BRCA	3993	3118	2849.96	kataegis	22.57	0.0079
f393bb0c-4178-ca4a-e040-11ac0d48455f	cancer	BRCA	2935	656	645.55	kataegis	1.08	0.0017
f6114c69-71a1-47d5-9b28-b0227b1872f7	cancer	BRCA	4095	904	619.86	kataegis	4.09	0.0066
f7b84bac-f161-9eee-e040-11ac0c4847ed	cancer	BRCA	2047	1719	1672.12	kataegis	3.62	0.0022
f7c7373c-1972-4968-e040-11ac0d486e80	cancer	BRCA	53	54184	55591.1	kataegis	28.98	0.0005
f7d128d2-3964-e3bc-e040-11ac0d481667	cancer	BRCA	4095	940	908.29	kataegis	3.07	0.0034
f7d7b3db-02af-61cb-e040-11ac0c480c03	cancer	BRCA	2047	965	955.56	kataegis	0	0
f7dcc2e4-1fc4-4b39-bc6a-720e66116d68	cancer	UCEC	63	22569	22793.7	kataegis	0	0
f7ed28a6-8f5f-e87b-e040-11ac0c48120e	cancer	BRCA	4095	586	542.36	kataegis	6.14	0.0113
f7f3e156-0dde-72b9-e040-11ac0d48542c	cancer	BRCA	919	1230	1139.56	kataegis	22.25	0.0195
f8f749b7-547d-49fa-9da2-44eed962b6fd	cancer	BRCA	1767	4637	4404.4	kataegis	24.37	0.0055
fb8b5ff5-4164-4276-b75b-b0ee6bda7329	cancer	ORCA	511	5633	5526.51	kataegis	63.48	0.0115
fb9135d9-2acf-41dd-8552-359e6b8c9470	cancer	BRCA	511	2977	2867.16	kataegis	5.77	0.002
fc447d4f-2532-c8ea-e040-11ac0c48469f	cancer	BRCA	511	551	541.92	kataegis	0	0
fc447d55-95d8-0b34-e040-11ac0d483afa	cancer	BRCA	1023	802	785.79	kataegis	1.73	0.0022
fc447d56-0d53-e0c3-e040-11ac0c4846a8	cancer	BRCA	377	5316	5311.97	kataegis	7.48	0.0014
fc8130df-3225-3f96-e040-11ac0d485dfe	cancer	BRCA	1023	10987	10594.7	kataegis	65.65	0.0062
fc8130df-6bec-7627-e040-11ac0d485e04	cancer	BRCA	511	1498	1493.66	kataegis	0	0
fc8130df-8ec8-5b1e-e040-11ac0d485e06	cancer	BRCA	234	13368	13437.1	kataegis	46.41	0.0035
fc8130df-e399-e34d-e040-11ac0c483279	cancer	BRCA	2047	6682	6300.28	kataegis	35.03	0.0056
fc8130e0-08dd-b996-e040-11ac0c48327b	cancer	BRCA	3969	826	727.06	kataegis	6.16	0.0085
fc8130e0-096a-b991-e040-11ac0c48327d	cancer	BRCA	127	10089	10568.5	kataegis	149.87	0.0142
fc8130e0-09f1-b964-e040-11ac0c48326e	cancer	BRCA	3538	782	706.02	kataegis	4.17	0.0059
fc8130e0-0f1a-b6eb-e040-11ac0c48328f	cancer	BRCA	1023	1945	1804.56	kataegis	10.37	0.0057
fc8130e0-a538-dda3-e040-11ac0c483264	cancer	BRCA	1691	1397	1277.28	kataegis	14.39	0.0113
fc8130e0-a8b4-d80d-e040-11ac0c483272	cancer	BRCA	1571	1407	1375.62	kataegis	6.77	0.0049
fc81312a-d451-38fb-e040-11ac0c4832a4	cancer	BRCA	2047	970	948.33	kataegis	1.21	0.0013
fd504153-3cf6-44b9-99d5-21961ebac188	cancer	UCEC	511	558	550.14	kataegis	2.89	0.0052
fe04d042-a4cc-4a14-8197-415ea40951aa	cancer	BRCA	409	4682	4668.37	kataegis	0	0
ffdd4feb-aca3-4104-b1e8-954d705a6450	cancer	BLCA	511	2555	2486.08	kataegis	51.94	0.0209
25f07374-313a-4100-9a60-3d21d2988fca	cancer	GACA	31	1352	1352	kataegis	0	0
ca137611-533a-4d20-a85d-8e4c3a1eab2d	cancer	ORCA	511	868	868	kataegis	0	0
