# Supplementary material for: APOBEC3A drives deaminase mutagenesis in human gastric epithelium
Source: HighWire-hosted journal article supplement (doi:10.1101/gr.280338.124), 2025-08-26
Supplement: Supplemental_Table_S10.xlsx [file Supplemental_Table_S10.xlsx]

## Sheet: Supplemental Table S10
Supplemental Table S10. Summary of negative binomial regression of APOBEC-associated mutations with three genomic features (H3K27me3, local transcription, and replication timing).
The following data is reported for doxycycline-treated hGOiA3A clones: marker = epigenetic markers, bin_group = binning group, fold-change = fold-change of mutation rates based on bin_group=2, lower_ci = lower limit of confidence interval, upper_ci = upper limit of confidence interval.
Marker	Bin_group	Fold-change	Lower_ci	Upper_ci
H3K27me3	0	0.977529	0.861659	1.11244
H3K27me3	1	1.03322	0.87656	1.21803
H3K27me3	2	1	1	1
H3K27me3	3	1.08515	0.921243	1.27853
H3K27me3	4	1.01737	0.861834	1.20116
Transcription	0	0.872068	0.782345	0.972274
Transcription	1	0.943492	0.846065	1.05227
Transcription	2	1	1	1
Transcription	3	1.02727	0.910736	1.15863
Transcription	4	1.18942	1.05365	1.34261
Replication timing	0	1.22375	1.05686	1.41602
Replication timing	1	1.07796	0.964527	1.20443
Replication timing	2	1	1	1
Replication timing	3	0.950181	0.857872	1.05246
Replication timing	4	0.971595	0.875251	1.07856
