# Supplementary material for: APOBEC3A drives deaminase mutagenesis in human gastric epithelium
Source: HighWire-hosted journal article supplement (doi:10.1101/gr.280338.124), 2025-08-26
Supplement: Supplemental_Table_S11.xlsx [file Supplemental_Table_S11.xlsx]

## Sheet: Supplemental Table S11
Supplemental Table S11. Culture medium composition for human gastric organoids.
Components = medium components, Final conc. = final concentration of components
Components	Final conc.
ADF-12	.
HEPES	10mM
P/S	0.01
GlutaMAX	1X
Wnt3A Conditiond Medium	0.5
RSPO1 Conditioned medium	0.1
hEGF / mEGF	50ng/ml
hNoggin	100ng/ml
hFGF10	200ng/ml
B27	1X
N-acetylcysteine	1mM
gastrin	1nM
Y-27632	10uM
TFG-b R kinase inhibitor IV (SB431542)	2uM
