# Supplementary material for: APOBEC3A drives deaminase mutagenesis in human gastric epithelium
Source: HighWire-hosted journal article supplement (doi:10.1101/gr.280338.124), 2025-08-26
Supplement: Supplemental_Table_S12.xlsx [file Supplemental_Table_S12.xlsx]

## Sheet: Supplemental Table S12
Supplemental Table S12. Electroporation programs for transfection of organoids.
Parameters = parameters, Poring pulse = programme of poring pulse, Transfer pulse = programme of transfer pulse
Parameters	Poring pulse	Transfer pulse
Voltage	175V	20V
Pulse length	5.0 ms	50ms
Pulse interval	50.0 ms	50ms
Number of pulses	2	5
Decay rate	0.1	0.4
Polarity	+	+/-
